# Supplementary material for: Analysis of Signaling Endosome Composition and Dynamics Using SILAC in Embryonic Stem Cell-Derived Neurons
Source: PubMed Central journal article supplement (PMC4739672; doi:10.1074/mcp.m115.051649), 2016-02

Figure S1 Debaisieux et al.

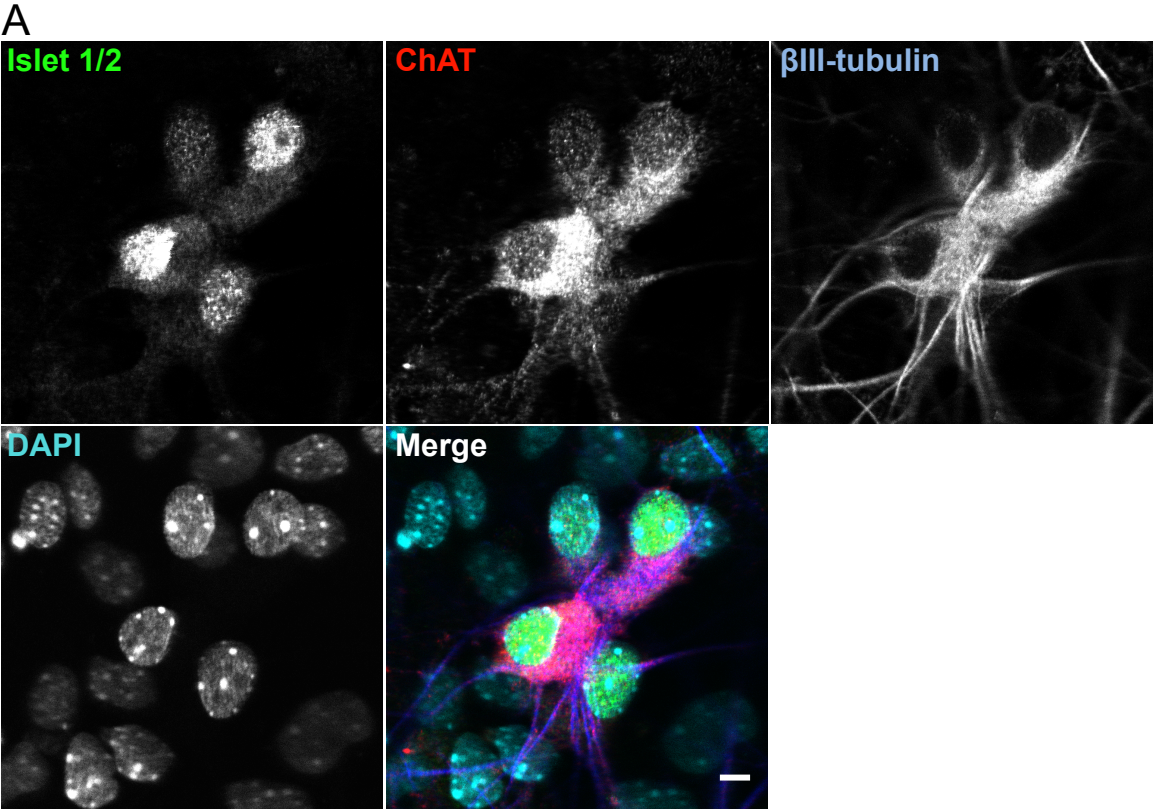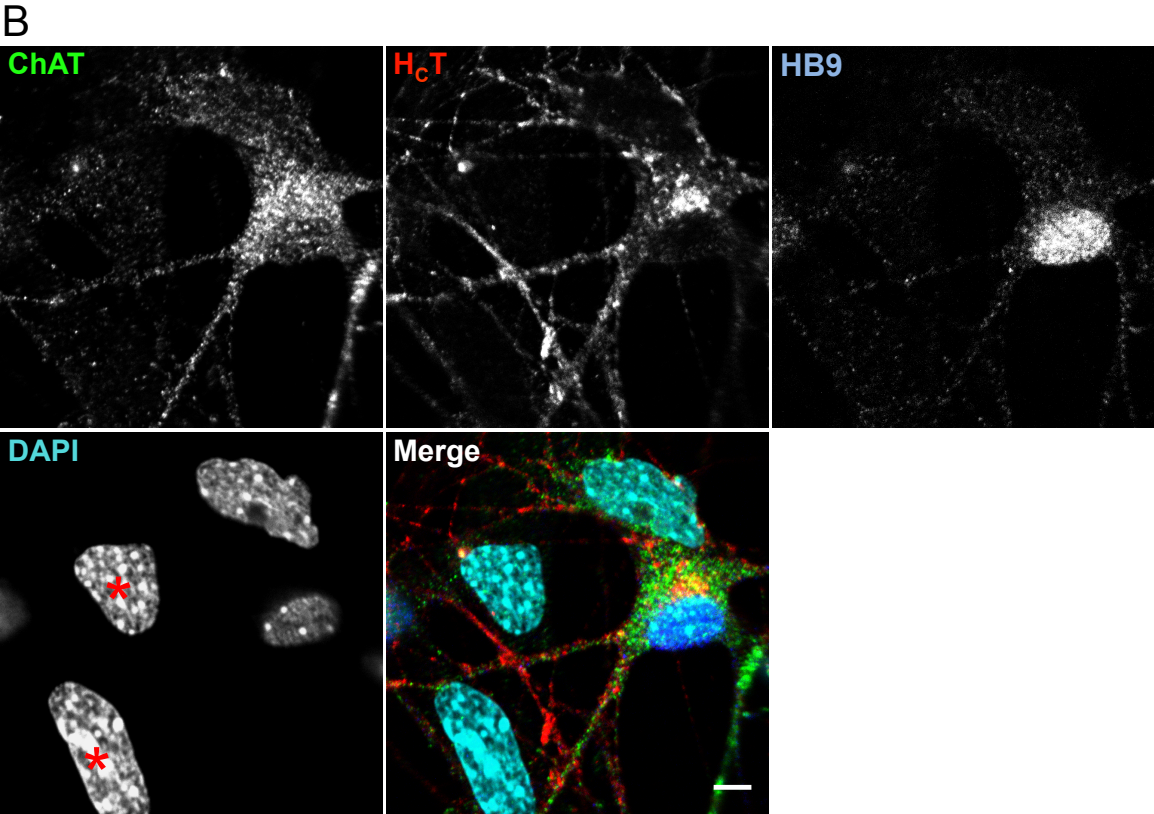

**Figure S2** Debaisieux et al.

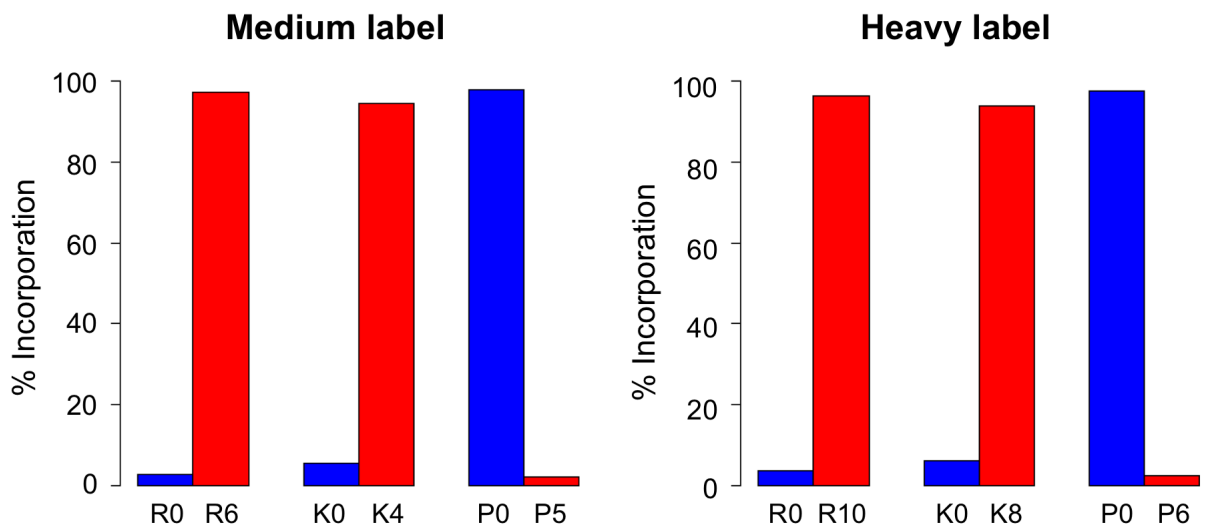

Figure S3 Debaisieux et al.

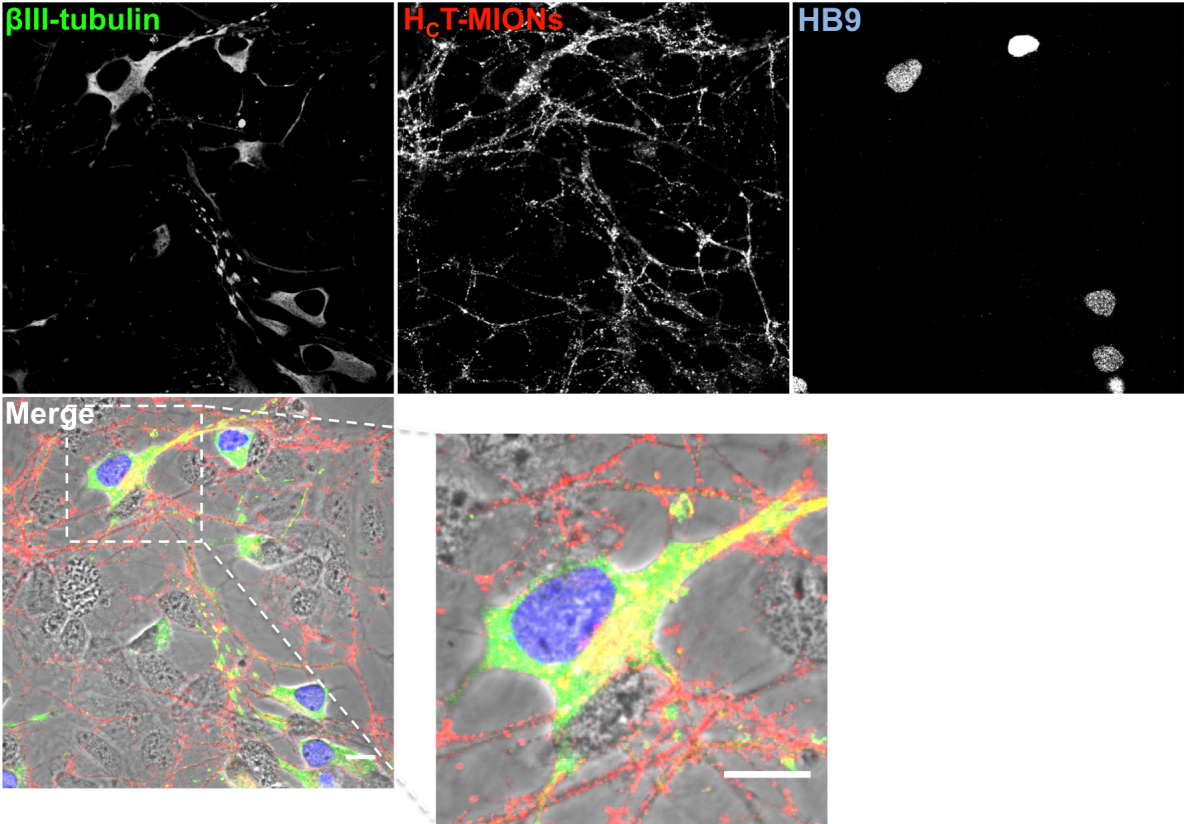

**Figure S4** Debaisieux et al.

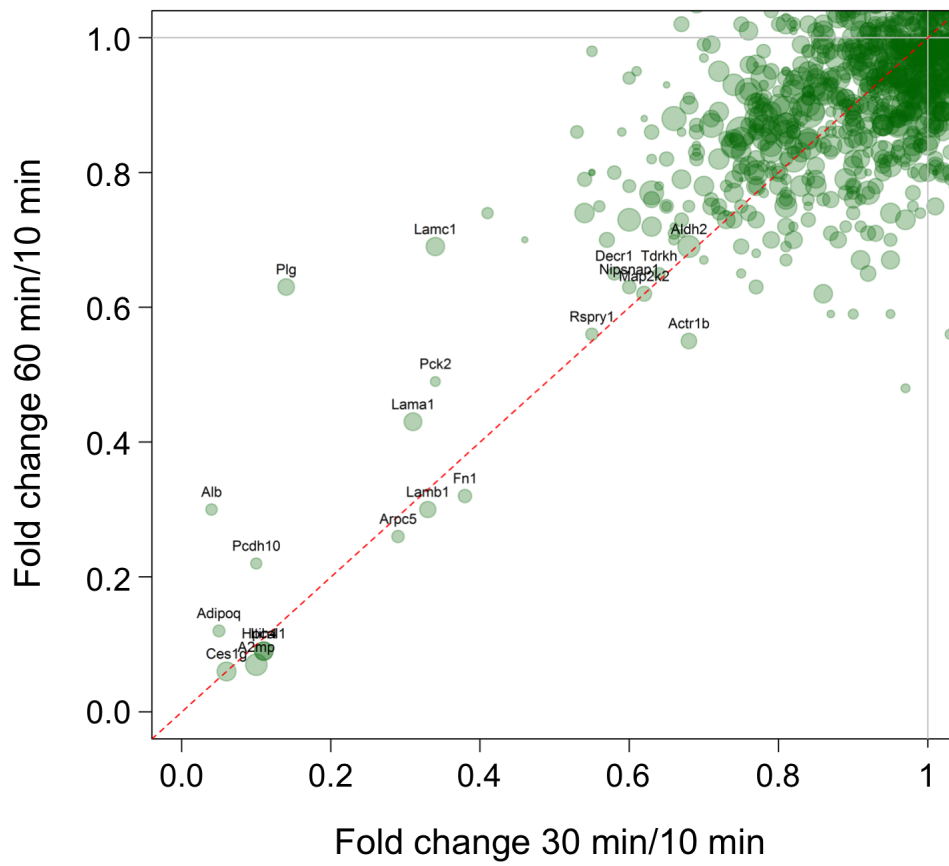

**Figure S5** Debaisieux et al.

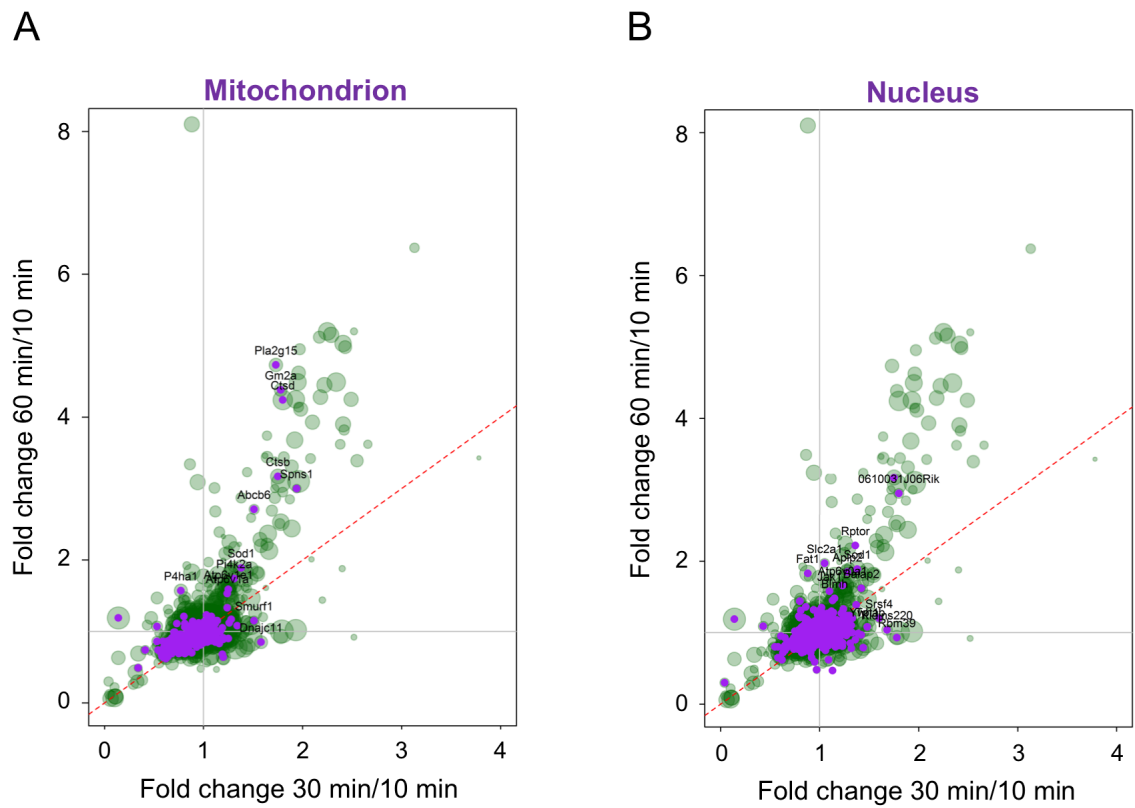

**Figure S6** Debaisieux et al.

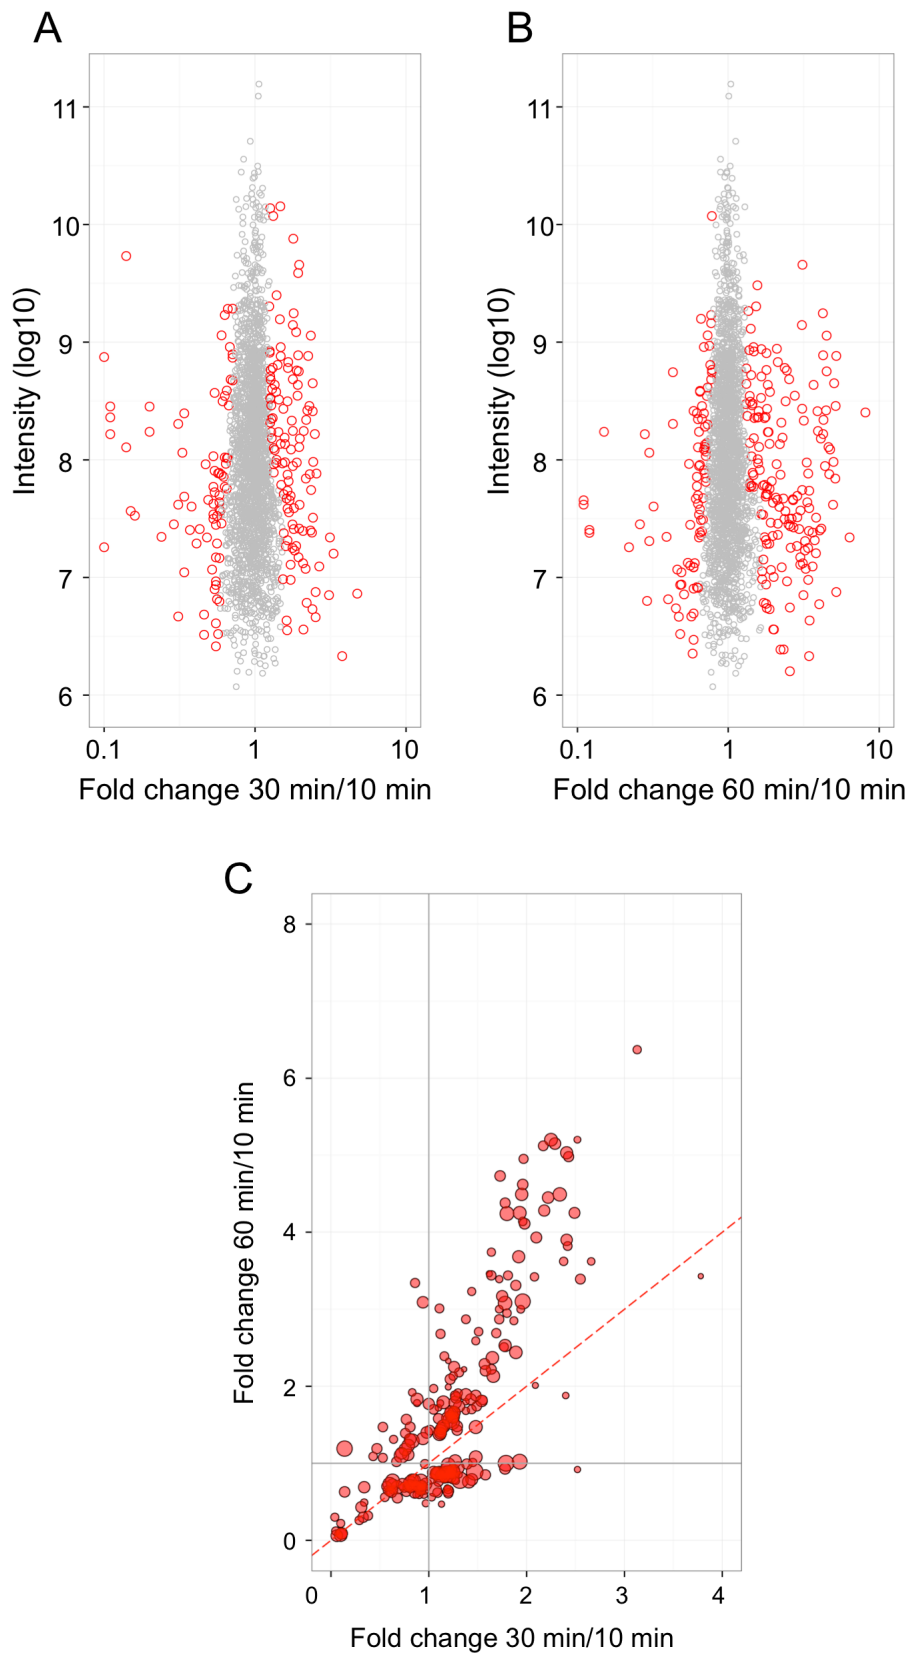

Figure S7 Debaisieux et al.

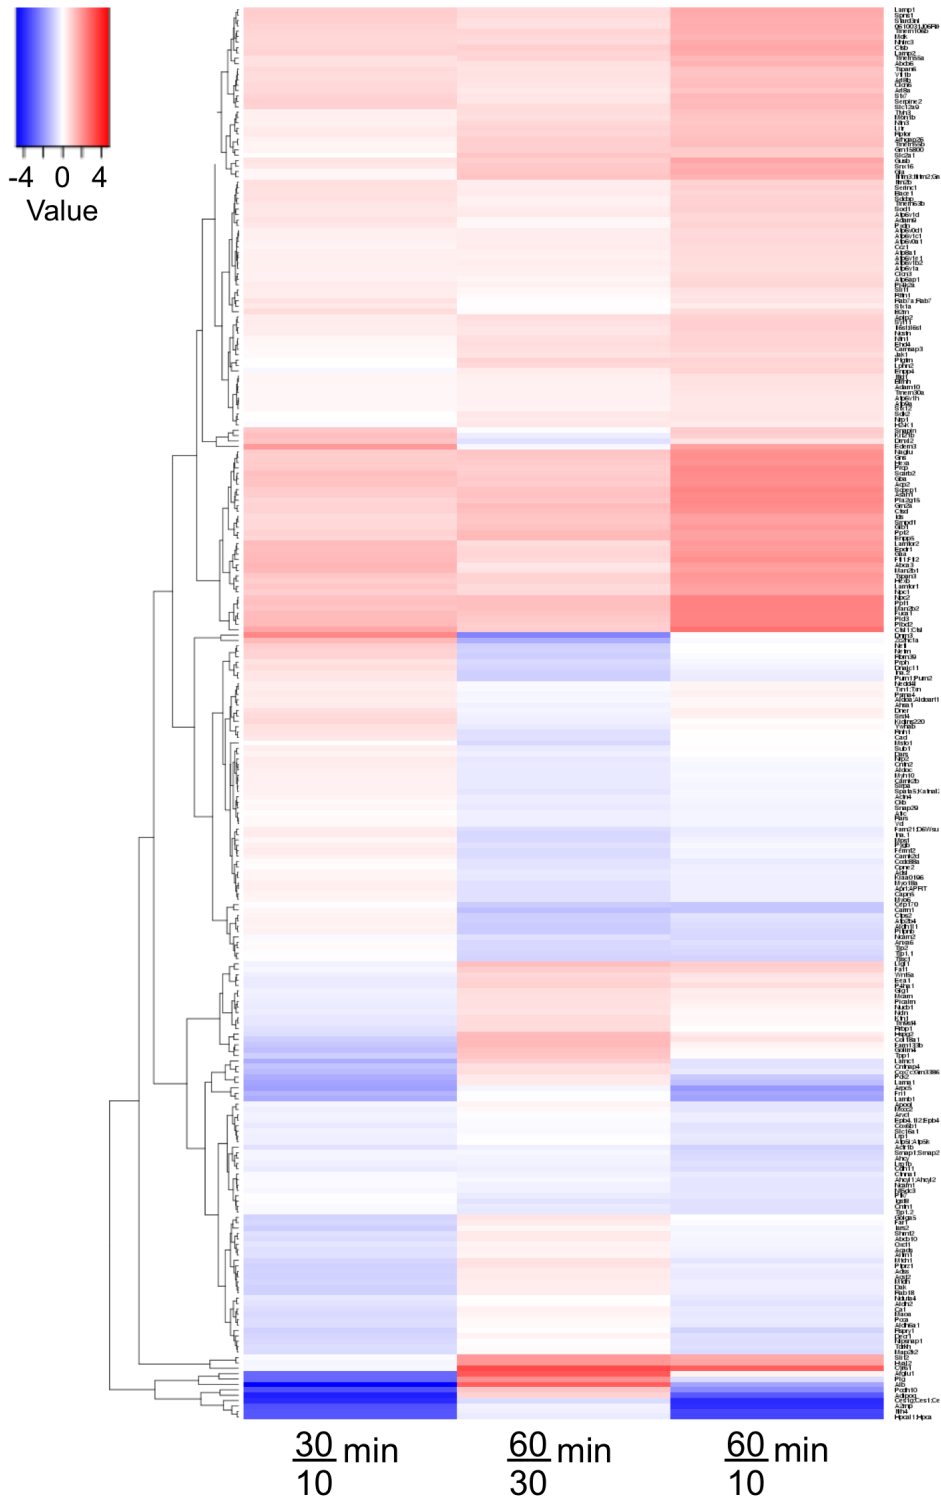

Supplement: 10.1074_M115.051649_mcp.M115.051649-1.pdf [file 10.1074_M115.051649_mcp.M115.051649-1.pdf]
